# Supplementary material for: A study on structural, optical, and electrical characteristics of perovskite CsPbBr3 QD/2D-TiSe2 nanosheet based nanocomposites for optoelectronic applications
Source: Royal Society of Chemistry journal article supplement (doi:10.1039/d1dt03423e), 2022-01-01
Supplement: d1dt03423e1.pdf [file d1dt03423e1.pdf]

## **Supporting Information**

### A study on structural, optical, and electrical characteristics of perovskite CsPbBr<sub>3</sub> QDs/2D-TiSe<sub>2</sub> nanosheets based nanocomposites for optoelectronic applications

Ashish Kumar<sup>[a, b]</sup>, Sanjay Kumar Swami<sup>[a]</sup>, Rohit Sharma<sup>[c]</sup>, Sandeep Yadav<sup>[d]</sup>, V.N. Singh<sup>[a, b]</sup>, Joerg J. Schneider<sup>[d]</sup>, O. P. Sinha<sup>[c]</sup>, Ritu Srivastava<sup>[a, b]</sup>,

<sup>a</sup>CSIR-National Physical Laboratory, Dr. KS Krishnan Marg, New Delhi-110012, India

<sup>b</sup>Academy of scientific and Innovative Research (AcSIR), Ghaziabad- 201002, India

<sup>c</sup>Amity Institute of Nanotechnology, Amity University UP, Noida, UP, India

<sup>d</sup>Technische Universität Darmstadt, Eduard-Zintl-Institut für Anorganische and Physikalische Chemie, Alarich-Weiss-Str.12 D-64287 Darmstadt, Germany

#### **S1. Characterization Technique**

CsPbBr<sub>3</sub> NPs and TiSe<sub>2</sub> NSs were examined by a transmission electron microscope (TEM) and High Resolution-TEM (HRTEM) of FEI Tecnai G2 F-30 STWIN operating at an accelerating voltage of 300 kV. The X-ray diffraction (XRD) pattern of perovskite NPs and 2D-TiSe<sub>2</sub> NSs was recorded using Rigaku mini Flex-600. A trapping mode atomic force microscopic (AFM) was performed by NDMDT-Solve Pro- P47 model system. The Fourier-transform infrared (FTIR) spectroscopic was recorded in transmission mode by Nicolet 5700-IR spectrometer. The field emission scanning electron microscopy (FESEM) studies was performed using Joel, JSM-7610F system. The steady-state fluorescence spectroscopy was recorded by Shimadzu 2401 PC (UV-Visible spectrometer), Fluorolog (Jobin Yvon-Horiba, model-3-11) (Photoluminescence spectrometer), and the lifetime decay was studied using time-correlated single-photon counting in Fluorolog (Jobin Yvon-Horiba, model -3-11) spectrophotometer system.

## S2. HRTEM image of QDs and NSs based nanocomposite.

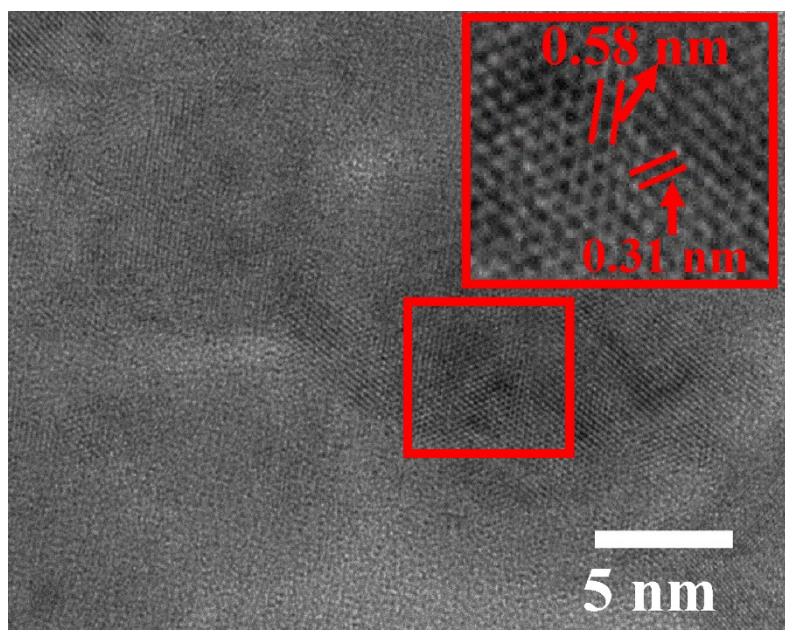

**Figure S1:** HRTEM image of the nanocomposite (QDs with NSs) structure

## S3. Schematic illustration of perovskite QDs and $\text{TiSe}_2$ nanosheets

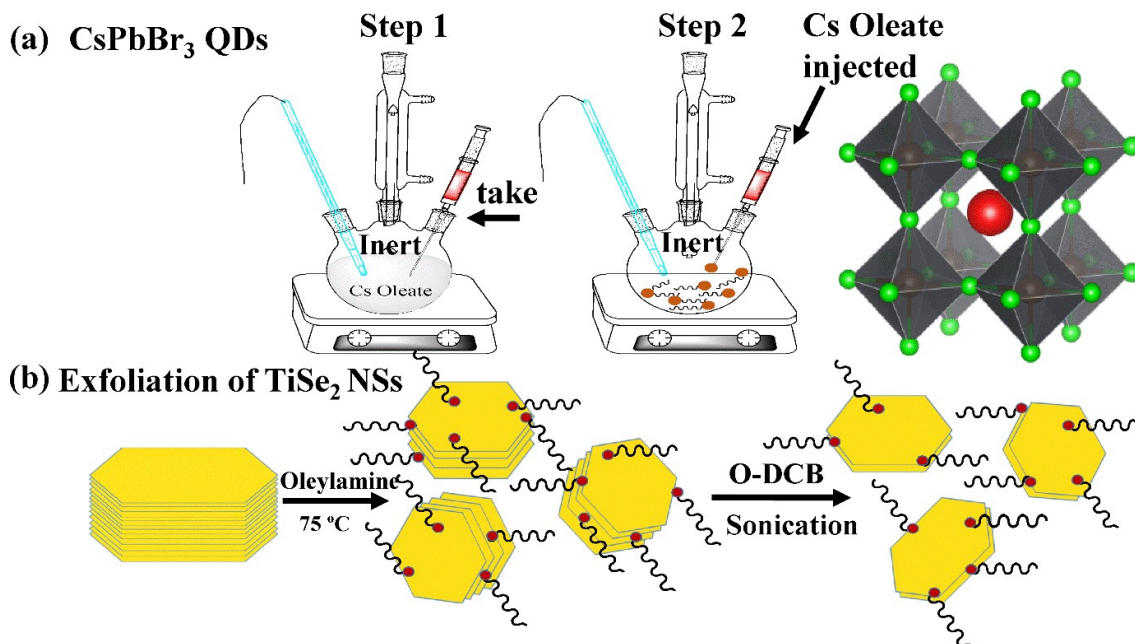

**Figure S2:** Schematic illustration of (a) synthesis of perovskite  $\text{CsPbBr}_3$  QDs by hot-injection method and (b) OAM- capped exfoliation of  $\text{TiSe}_2$  NSs under sonication.

**S4. Field Emission Scanning Electron Microscopic (FESEM) micrograph of perovskite QDs and TiSe<sub>2</sub> NSs.**

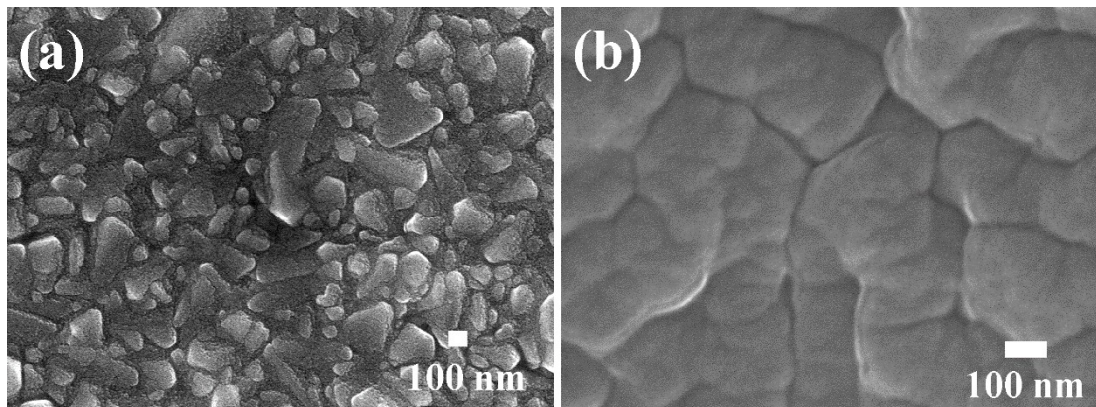

**Figure S3.** Purified (a) perovskite CsPbBr<sub>3</sub> QDs, magnifying view at 40000X, and (b) functionalized (F)-TiSe<sub>2</sub> NSs, magnifying view at 90000X.

**S5. Atomic force microscopy (AFM)**

The AFM micrograph of drop-casted TiSe<sub>2</sub> nanosheets on a SiO<sub>2</sub> substrate is shown in figure S4 (a), and the phase-contrast image is shown in Figure S4 (b). AFM studies revealed nanosheets' formation and thickness in the range of 8 to 23 nm (from different spots). It was predicted by its height profile, as shown in Figure S4 (c). The phase-contrast image of TiSe<sub>2</sub> NSs confirms the formation of NSs.

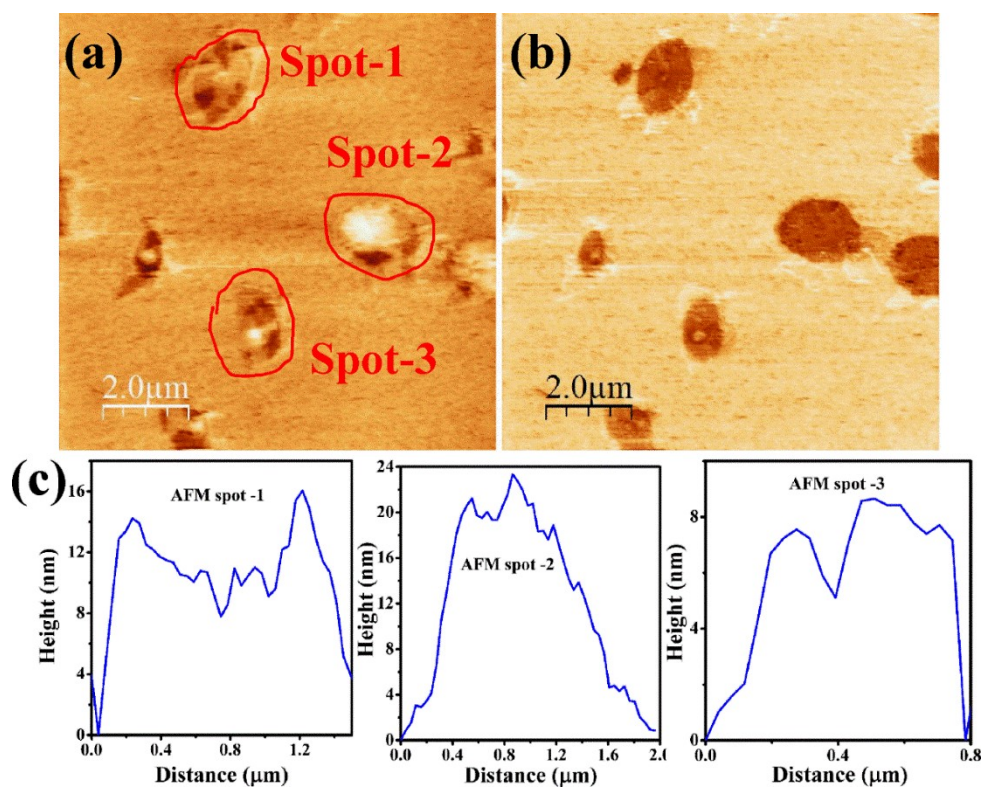

**Figure S4.** (a) AFM image of functionalized-TiSe<sub>2</sub> NSs, (b) phase-contrast image, and (c) height profile of functionalized NSs at different spots.

**Table S1.** The calculated charge transfer rate constant ( $K_{ET}$ ) for the nanocomposite.

| Nanocomposite                                    | $\tau_{avg}$ (ns) | $K_{ET}$ ( $10^8$ s <sup>-1</sup> ) |
|--------------------------------------------------|-------------------|-------------------------------------|
| CsPbBr <sub>3</sub> + 5 μg/mL TiSe <sub>2</sub>  | 4.51              | 1.5                                 |
| CsPbBr <sub>3</sub> + 10 μg/mL TiSe <sub>2</sub> | 2.73              | 2.95                                |
| CsPbBr <sub>3</sub> + 20 μg/mL TiSe <sub>2</sub> | 2.85              | 2.79                                |

### S6. Cyclic voltammetry of TiSe<sub>2</sub> NSs.

The cyclic voltammetry analysis was performed to evaluate the valence band maximum (VBM) level of TiSe<sub>2</sub> NSs (figure S5). The calculation of VBM of TiSe<sub>2</sub> NSs was done by the onset oxidation potential ( $E_{oxi}$ ) (shown in figure S5).<sup>[1, 2]</sup>

$$E_{VBM} = (E_{oxi} - E_{1/2}(\text{ferrocene}) + 4.8) \text{ eV} \quad (1)$$

Where,  $E_{1/2}$  (ferrocene) and  $E_{oxi}$  value was obtained 0.1 eV and 0.42 eV. The VBM level value is ~ 5.1 eV calculated by using equation (1).

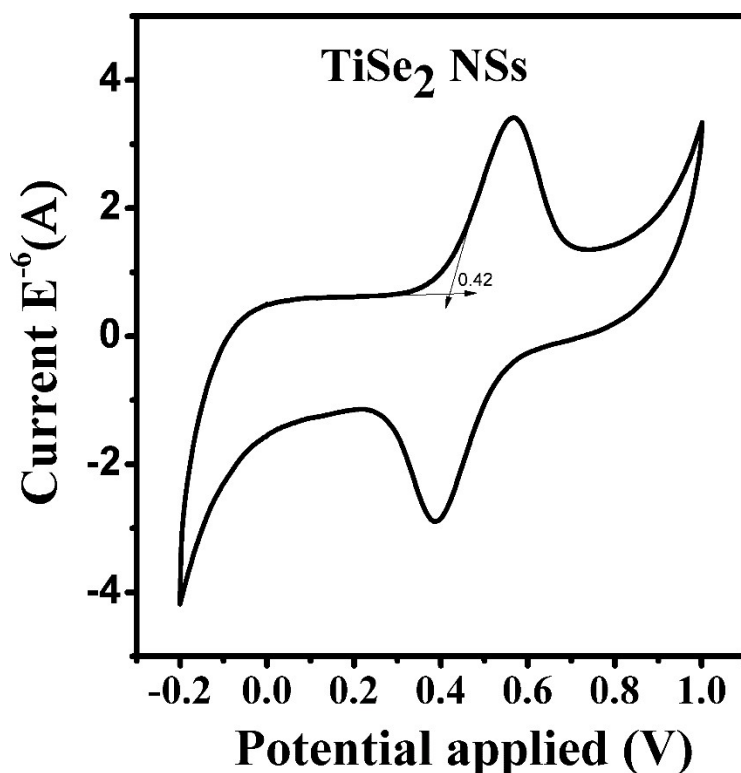

**Figure S5.** Cyclic voltammogram of TiSe<sub>2</sub> NSs.

### S7. Transient photocurrent (I-t) response of pristine and nanocomposite.

The I-t characteristics of pristine and nanocomposite sample shows good repeatability and stability for many on/off cycles (figure S6). The response time is 1.67s, 1.18s, and 1.19s for pristine, CsPbBr<sub>3</sub> + 5 μg/mL TiSe<sub>2</sub> and CsPbBr<sub>3</sub> + 10 μg/mL TiSe<sub>2</sub> sample respectively, and it can be seen that the response time decreases upon change in the concentration of TiSe<sub>2</sub> NSs.

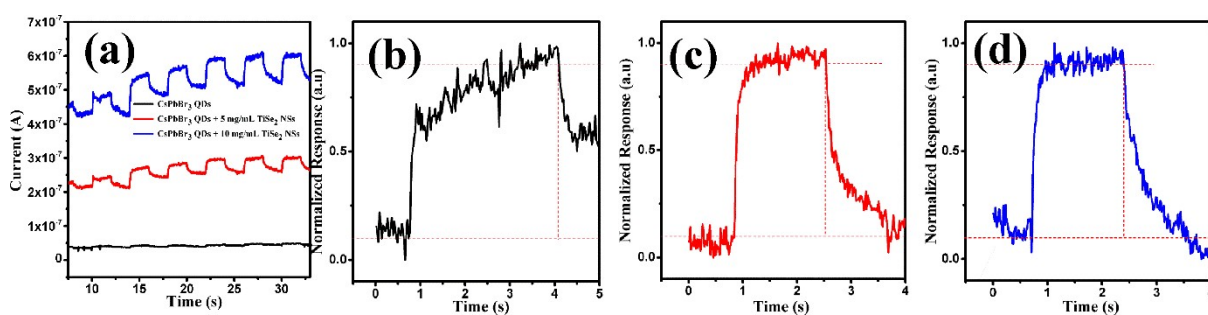

**Figure S6.** (a) Transient photocurrent of pristine QDs, nanocomposite (QDs with 5 μg/mL TiSe<sub>2</sub>) and nanocomposite (QDs with 10 μg/mL TiSe<sub>2</sub>), and (b, c & d) single normalized cycle of the photocurrent of pristine QDs, nanocomposite QDs with 5 μg/mL TiSe<sub>2</sub>) and nanocomposite (QDs with 10 μg/mL TiSe<sub>2</sub>),

## References

1. Alhalasah, W. and Holze, R., 2007. Electrochemical bandgaps of a series of poly-3-p-phenylthiophenes. *Journal of Solid State Electrochemistry*, 11(12), pp.1605-1612.
2. Pandey, S., Kumar, A., Karakoti, M., Garg, K.K., Rana, A., Tatrari, G., Bohra, B.S., Yadav, P.K., Singh, R.K. and Sahoo, N.G., 2021. 3D Graphene Nanosheets from Plastic Waste for Highly Efficient HTM free Perovskite Solar Cells. *Nanoscale Advances*.
